# Supplementary material for: Synthesis and properties of transparent polyimides derived from trans-1,4-bis(2,3-dicarboxyphenoxy)cyclohexane dianhydride
Source: Royal Society of Chemistry journal article supplement (doi:10.1039/c5ra07676e), 2015-01-01

## Supplementary Information

### Synthesis and properties of transparent polyimides derived from *trans*-1,4-bis(2,3-dicarboxyphenoxy)cyclohexane dianhydride

Yu Zhou<sup>a,b</sup>, Guofei Chen<sup>a\*</sup>, Huiwen Zhao<sup>a</sup>, Liping Song<sup>b</sup>, Xingzhong Fang<sup>a\*</sup>

**Figure S1.** COSY spectrum of **PI-2** in DMSO-*d*<sub>6</sub>

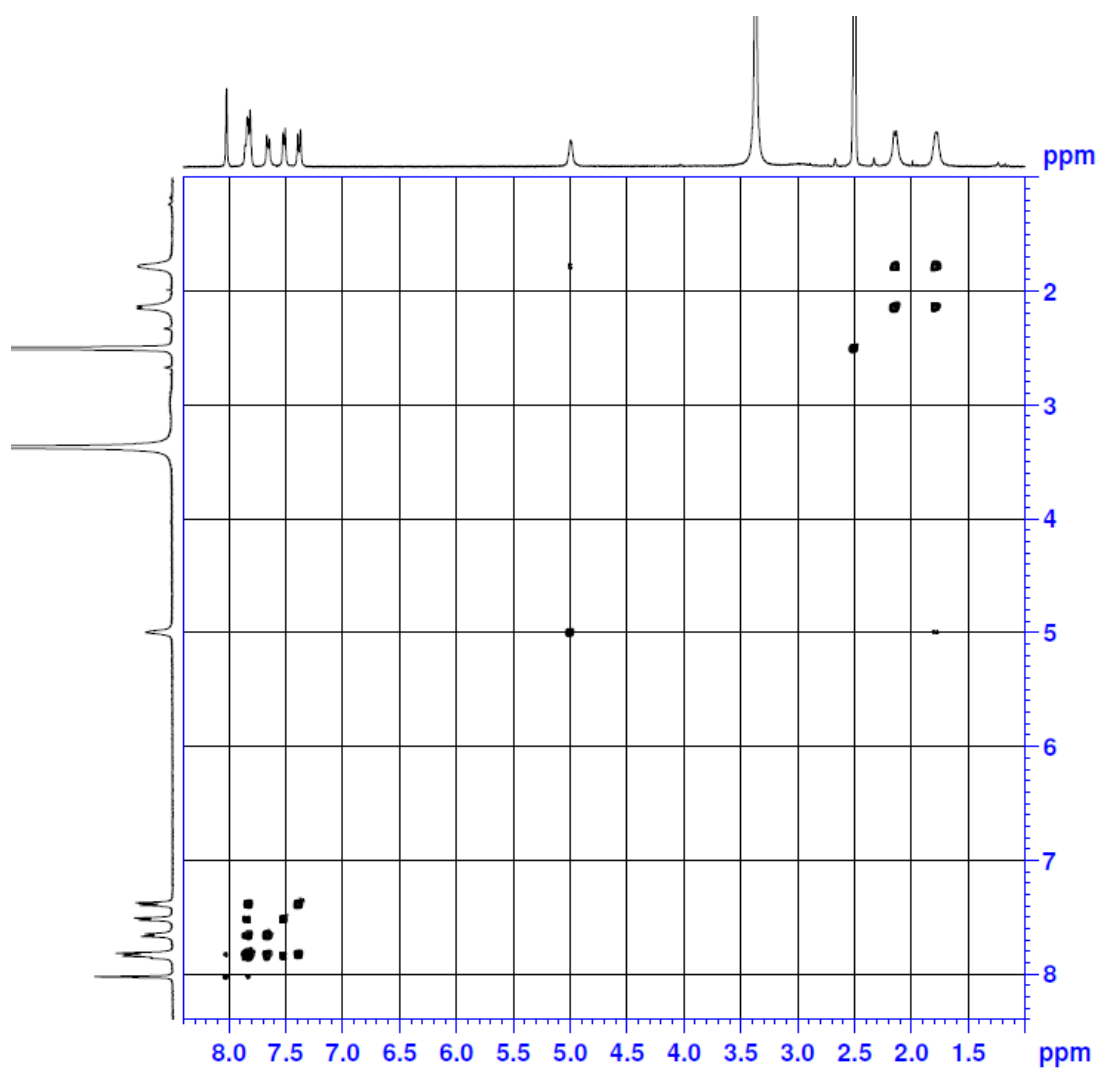

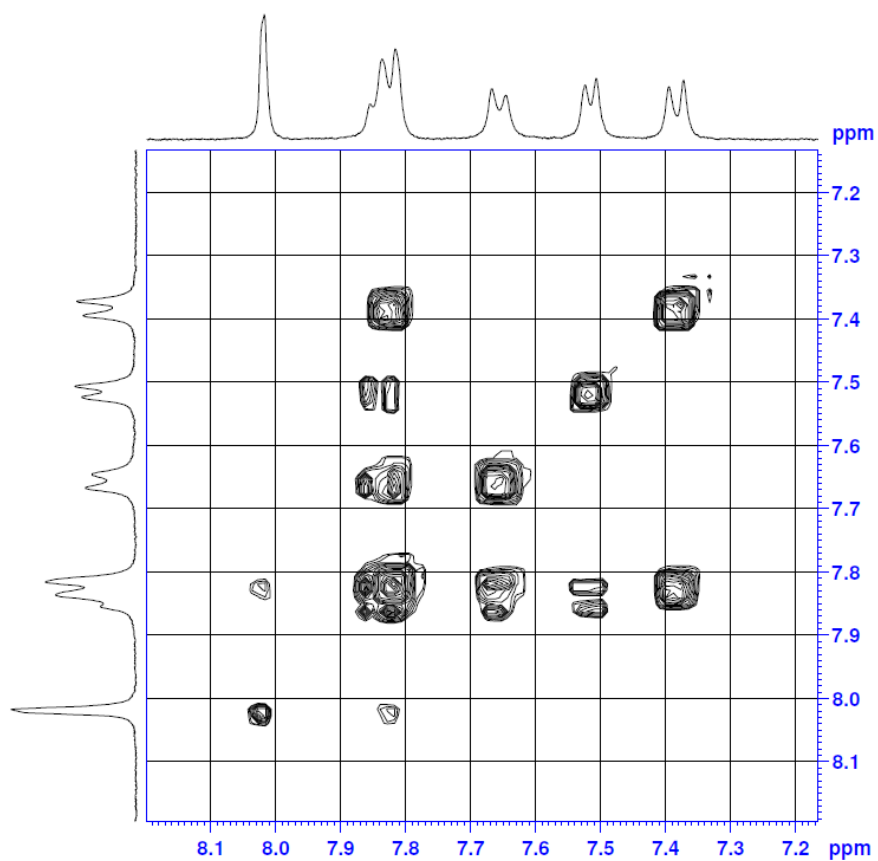

**Fig. 2** Wide-angle X-ray diffractograms of the polyimide films.

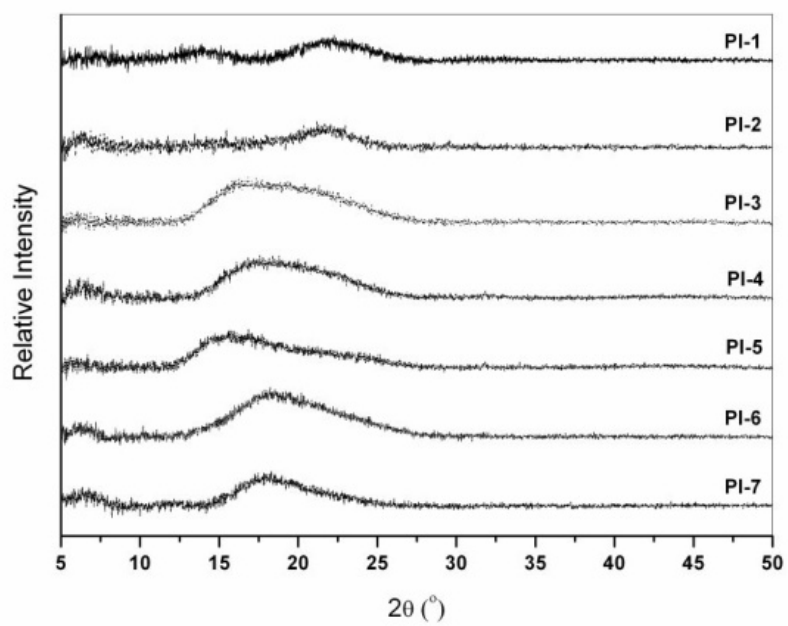

Supplement: c5ra07676e1.pdf [file c5ra07676e1.pdf]
